# Supplementary material for: Systematic Review: Contribution of the Gut Microbiome to the Volatile Metabolic Fingerprint of Colorectal Neoplasia
Source: MDPI journal article supplement (doi:10.3390/metabo13010055), 2022-12-30

< BACK TO BASIC SEARCHES

Advanced Search Query Builder

DOCUMENTS

RESEARCHERS

Search in: Web of Science Core Collection Editions: All

Add terms to the query search preview

All Fields

Example: liver disease india singh

Add to query

And

More options

Search Help

Query Preview

ALL=(rectal neoplasm)

+ Add date range

X Clear

Add to history

Booleans : AND, OR, NOT

Field Tags :

TS=Topic

TI=Title

AB=Abstract

AU=[Author]

AI=Author Identifiers

AK=Author Keywords

GP=[Group Author]

ED=Editor

KP=Keyword Plus®

SO=[Publication Titles]

DO=DOI

PY=Year Published

CF=Conference

AD=Address

OG=[Affiliation]

OO=Organization

SG=Suborganization

SA=Street Address

CI=City

PS=Province/State

CU=Country/Region

ZP=Zip/Postal Code

FO=Funding Agency

FG=Grant Number

FD=Funding Details

FT=Funding Text

SU=Research Area

WC=Web of Science Categories

IS= ISSN/ISBN

UT=Accession Number

PMID=PubMed ID

DOP=Publication Date

PUBL=Publisher

ALL=All Fields

FPY=Final publication year

Session Queries

Build a new query based on your searches in this session.

35/35

Combine Sets

Clear History

35

#33 AND #34

1,107

Add to query

34

#6 OR #14

268,932

Add to query

33

#32 OR #31 OR #29 OR #30 OR #28 OR #27 OR #25 OR #26 OR #24 OR #23 OR #22 OR #21 OR #20

359,609

Add to query

32

ALL=(rectal neoplasm)

4,516

Add to query

31

ALL=(rectal neoplasms)

4,518

Add to query

30

ALL=(colonic neoplasms)

3,179

Add to query

29

ALL=(colonic neoplasm)

3,177

Add to query

28

ALL=(colorectal

13,190

Add to query

https://www-webofscience-com.mu.idm.oclc.org/wos/woscc/advanced-search

1/3

|                                     |    |                                             |         |                |                                                                                                                                                                                               |
|-------------------------------------|----|---------------------------------------------|---------|----------------|-----------------------------------------------------------------------------------------------------------------------------------------------------------------------------------------------|
|                                     |    | neoplasms)                                  |         |                |                                                                                                                                                                                               |
| <input checked="" type="checkbox"/> | 27 | ALL=(colorectal neoplasm)                   | 13,172  | Add to query ▾ | <a href="#">↔</a>       |
| <input checked="" type="checkbox"/> | 26 | ALL=(colorectal adenoma)                    | 18,082  | Add to query ▾ | <a href="#">↔</a>       |
| <input checked="" type="checkbox"/> | 25 | ALL=(colorectal polyps)                     | 14,669  | Add to query ▾ | <a href="#">↔</a>       |
| <input checked="" type="checkbox"/> | 24 | ALL=(colorectal polyp)                      | 14,657  | Add to query ▾ | <a href="#">↔</a>       |
| <input checked="" type="checkbox"/> | 23 | ALL=(colorectal neoplasms)                  | 13,190  | Add to query ▾ | <a href="#">↔</a>       |
| <input checked="" type="checkbox"/> | 22 | ALL=(colorectal neoplasm)                   | 13,172  | Add to query ▾ | <a href="#">↔</a>       |
| <input checked="" type="checkbox"/> | 21 | ALL=(colorectal neoplasia)                  | 10,323  | Add to query ▾ | <a href="#">↔</a>       |
| <input checked="" type="checkbox"/> | 20 | ALL=(colorectal tumor)                      | 109,642 | Add to query ▾ | <a href="#">↔</a>       |
| <input checked="" type="checkbox"/> | 19 | ALL=(colorectal cancer)                     | 241,300 | Add to query ▾ | <a href="#">↔</a>     |
| <input checked="" type="checkbox"/> | 18 | ALL=(rectal cancer)                         | 55,833  | Add to query ▾ | <a href="#">↔</a>   |
| <input checked="" type="checkbox"/> | 17 | ALL=(colon cancer)                          | 150,939 | Add to query ▾ | <a href="#">↔</a>   |
| <input checked="" type="checkbox"/> | 16 | ALL=(colorectal carcinoma)                  | 69,007  | Add to query ▾ | <a href="#">↔</a>   |
| <input checked="" type="checkbox"/> | 15 | ALL=(colorectal cancer)                     | 241,300 | Add to query ▾ | <a href="#">↔</a>   |
| <input checked="" type="checkbox"/> | 14 | #8 OR #13 OR #11 OR #10 OR #12 OR #9 OR #7  | 229,363 | Add to query ▾ | <a href="#">↔</a>   |
| <input checked="" type="checkbox"/> | 13 | ALL=(Selected-ion flow-tube)                | 915     | Add to query ▾ | <a href="#">↔</a>   |
| <input checked="" type="checkbox"/> | 12 | ALL=(GCxGC)                                 | 1,247   | Add to query ▾ | <a href="#">↔</a>   |
| <input checked="" type="checkbox"/> | 11 | ALL=(GCMS)                                  | 9,047   | Add to query ▾ | <a href="#">↔</a>   |
| <input checked="" type="checkbox"/> | 10 | ALL=(GC MS)                                 | 113,080 | Add to query ▾ | <a href="#">↔</a>   |
| <input checked="" type="checkbox"/> | 9  | ALL=(Gas chromatography mass spectrometry)  | 86,440  | Add to query ▾ | <a href="#">↔</a>   |
| <input checked="" type="checkbox"/> | 8  | ALL=(Gas chromatography mass spectrometry ) | 86,440  | Add to query ▾ | <a href="#">↔</a>   |

|                                     |   |                                  |         |                |                   |                   |                   |
|-------------------------------------|---|----------------------------------|---------|----------------|-------------------|-------------------|-------------------|
| <input checked="" type="checkbox"/> | 7 | ALL=(Gas chromatography)         | 154,211 | Add to query ▾ | <a href="#">🔗</a> | <a href="#">✎</a> | <a href="#">🔔</a> |
| <input checked="" type="checkbox"/> | 6 | #5 OR #4 OR #3 OR #2 OR #1       | 50,163  | Add to query ▾ | <a href="#">🔗</a> | <a href="#">✎</a> | <a href="#">🔔</a> |
| <input checked="" type="checkbox"/> | 5 | ALL=(breathomics)                | 109     | Add to query ▾ | <a href="#">🔗</a> | <a href="#">✎</a> | <a href="#">🔔</a> |
| <input checked="" type="checkbox"/> | 4 | ALL=(volatolomics)               | 68      | Add to query ▾ | <a href="#">🔗</a> | <a href="#">✎</a> | <a href="#">🔔</a> |
| <input checked="" type="checkbox"/> | 3 | ALL=(volatolome)                 | 22      | Add to query ▾ | <a href="#">🔗</a> | <a href="#">✎</a> | <a href="#">🔔</a> |
| <input checked="" type="checkbox"/> | 2 | ALL=(volatile organic compounds) | 50,096  | Add to query ▾ | <a href="#">🔗</a> | <a href="#">✎</a> | <a href="#">🔔</a> |
| <input checked="" type="checkbox"/> | 1 | ALL=(volatile organic compound)  | 49,888  | Add to query ▾ | <a href="#">🔗</a> | <a href="#">✎</a> | <a href="#">🔔</a> |

Netherlands Consortium  Maastricht University

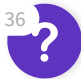

Supplement: s1 [file s1]
