# Supplementary material for: Systematic Review: Contribution of the Gut Microbiome to the Volatile Metabolic Fingerprint of Colorectal Neoplasia
Source: MDPI journal article supplement (doi:10.3390/metabo13010055), 2022-12-30
Supplement: s1 [file s1]

< BACK TO BASIC SEARCHES

Advanced Search Query Builder

DOCUMENTS

RESEARCHERS

Search in: Web of Science Core Collection Editions: All

Add terms to the query search preview

All Fields

Example: liver disease india singh

And

Add to query

More options

Query Preview

ALL=(metagenome)

+ Add date range

X Clear

Add to history

Search Help

Booleans : AND, OR, NOT

Field Tags :

- TS=Topic
- TI=Title
- AB=Abstract
- AU=[Author]
- AI=Author Identifiers
- AK=Author Keywords
- GP=[Group Author]
- ED=Editor
- KP=Keyword Plus®
- SO=[Publication Titles]
- DO=DOI
- PY=Year Published
- CF=Conference
- AD=Address
- OG=[Affiliation]
- OO=Organization
- SG=Suborganization
- SA=Street Address
- CI=City
- PS=Province/State
- CU=Country/Region
- ZP=Zip/Postal Code
- FO=Funding Agency
- FG=Grant Number
- FD=Funding Details
- FT=Funding Text
- SU=Research Area
- WC=Web of Science Categories
- IS= ISSN/ISBN
- UT=Accession Number
- PMID=PubMed ID
- DOP=Publication Date
- PUBL=Publisher
- ALL=All Fields
- FPY=Final publication year

Session Queries

Build a new query based on your searches in this session.

1/41

Combine Sets

Clear History

41

#29 AND #19 and Meta Analysis (Search within all fields)

87

Add to query

40

#29 AND #19 and Meta-analysis (Search within all fields)

76

Add to query

39

#29 AND #19 and Meta Analysis (Search within all fields)

87

Add to query

38

#29 AND #19 and Systematic Review (Search within all fields)

98

Add to query

37

#29 AND #19 and Review Articles (Document Types) and Systematic Review (Search within all fields)

86

Add to query

https://www-webofscience-com.mu.idm.oclc.org/wos/woscc/advanced-search

36

1/4

|                          |    |                                                                                           |         |                              |                   |                   |                   |
|--------------------------|----|-------------------------------------------------------------------------------------------|---------|------------------------------|-------------------|-------------------|-------------------|
| <input type="checkbox"/> | 36 | #29 AND #19 and Review Articles (Document Types) and Review Articles (Document Types) and | 86      | <a href="#">Add to query</a> | <a href="#">↗</a> | <a href="#">✎</a> | <a href="#">🔔</a> |
| <input type="checkbox"/> | 35 | #29 AND #19 and Review Articles (Document Types) and Review Articles (Document Types) and | 86      | <a href="#">Add to query</a> | <a href="#">↗</a> | <a href="#">✎</a> | <a href="#">🔔</a> |
| <input type="checkbox"/> | 34 | #29 AND #19 and Review Articles (Document Types) and Review Articles (Document Types) and | 35      | <a href="#">Add to query</a> | <a href="#">↗</a> | <a href="#">✎</a> | <a href="#">🔔</a> |
| <input type="checkbox"/> | 33 | #29 AND #19 and Review Articles (Document Types) and Review Articles (Document Types) and | 86      | <a href="#">Add to query</a> | <a href="#">↗</a> | <a href="#">✎</a> | <a href="#">🔔</a> |
| <input type="checkbox"/> | 32 | #29 AND #19 and Review Articles (Document Types) and Review Articles (Document Types)     | 1,380   | <a href="#">Add to query</a> | <a href="#">↗</a> | <a href="#">✎</a> | <a href="#">🔔</a> |
| <input type="checkbox"/> | 31 | #29 AND #19 and Review Articles (Document Types)                                          | 1,380   | <a href="#">Add to query</a> | <a href="#">↗</a> | <a href="#">✎</a> | <a href="#">🔔</a> |
| <input type="checkbox"/> | 30 | #29 AND #19                                                                               | 4,623   | <a href="#">Add to query</a> | <a href="#">↗</a> | <a href="#">✎</a> | <a href="#">🔔</a> |
| <input type="checkbox"/> | 29 | #20 OR #21 OR #22 OR #23 OR #24 OR #25 OR #26 OR #27 OR #28                               | 140,227 | <a href="#">Add to query</a> | <a href="#">↗</a> | <a href="#">✎</a> | <a href="#">🔔</a> |
| <input type="checkbox"/> | 28 | ALL=(metagenome)                                                                          | 6,329   | <a href="#">Add to query</a> | <a href="#">↗</a> | <a href="#">✎</a> | <a href="#">🔔</a> |
| <input type="checkbox"/> | 27 | ALL=(metagenomics)                                                                        | 11,540  | <a href="#">Add to query</a> | <a href="#">↗</a> | <a href="#">✎</a> | <a href="#">🔔</a> |
| <input type="checkbox"/> | 26 | ALL=(mycobiota)                                                                           | 1,712   | <a href="#">Add to query</a> | <a href="#">↗</a> | <a href="#">✎</a> | <a href="#">🔔</a> |
| <input type="checkbox"/> | 25 | ALL=(mycobiome)                                                                           | 796     | <a href="#">Add to query</a> | <a href="#">↗</a> | <a href="#">✎</a> | <a href="#">🔔</a> |
| <input type="checkbox"/> | 24 | ALL=(microbiota)                                                                          | 96,187  | <a href="#">Add to query</a> | <a href="#">↗</a> | <a href="#">✎</a> | <a href="#">🔔</a> |
| <input type="checkbox"/> | 23 | ALL=(gut microbiota)                                                                      | 57,145  | <a href="#">Add to query</a> | <a href="#">↗</a> | <a href="#">✎</a> | <a href="#">🔔</a> |
| <input type="checkbox"/> | 22 | ALL=(gut microbiome)                                                                      | 27,468  | <a href="#">Add to query</a> | <a href="#">↗</a> | <a href="#">✎</a> | <a href="#">🔔</a> |
| <input type="checkbox"/> | 21 | ALL=(gastrointestinal microbiome)                                                         | 6,442   | <a href="#">Add to query</a> | <a href="#">↗</a> | <a href="#">✎</a> | <a href="#">🔔</a> |
| <input type="checkbox"/> | 20 | ALL=(microbiome)                                                                          | 57,724  | <a href="#">Add to query</a> | <a href="#">↗</a> | <a href="#">✎</a> | <a href="#">🔔</a> |

|                          |    |                                                                                                                      |         |                         |             |             |             |
|--------------------------|----|----------------------------------------------------------------------------------------------------------------------|---------|-------------------------|-------------|-------------|-------------|
| <input type="checkbox"/> | 19 | <div>#18 OR #17 OR #16<br/>OR #15 OR #14 OR<br/>#13 OR #12 OR #11<br/>OR #10 OR #9 OR #8<br/>OR #7 OR #6 OR #5</div> | 359,907 | <div>Add to query</div> | <div></div> | <div></div> | <div></div> |
| <input type="checkbox"/> | 18 | ALL=(rectal neoplasm)                                                                                                | 4,523   | <div>Add to query</div> | <div></div> | <div></div> | <div></div> |
| <input type="checkbox"/> | 17 | ALL=(rectal neoplasms)                                                                                               | 4,525   | <div>Add to query</div> | <div></div> | <div></div> | <div></div> |
| <input type="checkbox"/> | 16 | ALL=(colonic neoplasms)                                                                                              | 3,185   | <div>Add to query</div> | <div></div> | <div></div> | <div></div> |
| <input type="checkbox"/> | 15 | ALL=(colonic neoplasm)                                                                                               | 3,183   | <div>Add to query</div> | <div></div> | <div></div> | <div></div> |
| <input type="checkbox"/> | 14 | ALL=(colorectal neoplasms)                                                                                           | 13,210  | <div>Add to query</div> | <div></div> | <div></div> | <div></div> |
| <input type="checkbox"/> | 13 | ALL=(colorectal neoplasm)                                                                                            | 13,192  | <div>Add to query</div> | <div></div> | <div></div> | <div></div> |
| <input type="checkbox"/> | 12 | ALL=(colorectal adenoma)                                                                                             | 18,097  | <div>Add to query</div> | <div></div> | <div></div> | <div></div> |
| <input type="checkbox"/> | 11 | ALL=(colorectal polyps)                                                                                              | 14,683  | <div>Add to query</div> | <div></div> | <div></div> | <div></div> |
| <input type="checkbox"/> | 10 | ALL=(colorectal polyp)                                                                                               | 14,671  | <div>Add to query</div> | <div></div> | <div></div> | <div></div> |
| <input type="checkbox"/> | 9  | ALL=(colorectal neoplasms)                                                                                           | 13,210  | <div>Add to query</div> | <div></div> | <div></div> | <div></div> |
| <input type="checkbox"/> | 8  | ALL=(colorectal neoplasm)                                                                                            | 13,192  | <div>Add to query</div> | <div></div> | <div></div> | <div></div> |
| <input type="checkbox"/> | 7  | ALL=(colorectal neoplasia)                                                                                           | 10,333  | <div>Add to query</div> | <div></div> | <div></div> | <div></div> |
| <input type="checkbox"/> | 6  | ALL=(colorectal tumor)                                                                                               | 109,762 | <div>Add to query</div> | <div></div> | <div></div> | <div></div> |
| <input type="checkbox"/> | 5  | ALL=(colorectal cancer)                                                                                              | 241,539 | <div>Add to query</div> | <div></div> | <div></div> | <div></div> |
| <input type="checkbox"/> | 4  | ALL=(rectal cancer)                                                                                                  | 55,873  | <div>Add to query</div> | <div></div> | <div></div> | <div></div> |
| <input type="checkbox"/> | 3  | ALL=(colon cancer)                                                                                                   | 151,056 | <div>Add to query</div> | <div></div> | <div></div> | <div></div> |
| <input type="checkbox"/> | 2  | ALL=(colorectal carcinoma)                                                                                           | 69,063  | <div>Add to query</div> | <div></div> | <div></div> | <div></div> |
| <input type="checkbox"/> | 1  | ALL=(colorectal cancer)                                                                                              | 241,539 | <div>Add to query</div> | <div></div> | <div></div> | <div></div> |
