# Supplementary material for: Systematic Review: Contribution of the Gut Microbiome to the Volatile Metabolic Fingerprint of Colorectal Neoplasia
Source: MDPI journal article supplement (doi:10.3390/metabo13010055), 2022-12-30
Supplement: s1 [file s1]

Supplementary Materials – Included studies on gut microbiota associated with colorectal neoplasia

**Huybrechts *et al.* 2020** CRC vs. controls.

| Taxa    | Name                                 | Biosample             | CRC enriched/depleted |
|---------|--------------------------------------|-----------------------|-----------------------|
| Phylum  |                                      |                       |                       |
|         | Fusobacteriota                       | feces, tissue         | Enriched              |
| Family  |                                      |                       |                       |
|         | <i>Fusobacteriaceae</i>              | feces, tissue         | Enriched              |
|         | <i>Lachnospiraceae</i>               | feces, tissue         | Depleted              |
|         | <i>Peptostreptococcaceae</i>         | feces                 | Enriched              |
|         | <i>Porphyromonadaceae</i>            | feces                 | Enriched              |
|         | <i>Rimunococcaceae</i>               | feces, tissue         | Depleted              |
| Genus   |                                      |                       |                       |
|         | <i>Acinetobacter</i>                 | feces                 | Depleted              |
|         | <i>Atopobium</i>                     | feces, tissue         | Enriched              |
|         | <i>Bifidobacterium</i>               | feces, tissue         | Depleted              |
|         | <i>Blautia</i>                       | feces, tissue         | Depleted              |
|         | <i>Desulfovibrio</i>                 | feces                 | Enriched              |
|         | <i>Fusobacterium</i>                 | feces, tissue         | Enriched              |
|         | <i>Gemella</i>                       | feces, tissue         | Enriched              |
|         | <i>Leptotrichia</i>                  | feces, tissue, saliva | Enriched              |
|         | <i>Odoribacter</i>                   | feces                 | Enriched              |
|         |                                      |                       |                       |
| Species | <i>Oscillibacter</i>                 | feces                 | Enriched              |
|         | <i>Parvimonas</i>                    | feces                 | Enriched              |
|         | <i>Peptostreptococcus</i>            | feces, tissue         | Enriched              |
|         | <i>Porphyromonas</i>                 | feces, tissue         | Enriched              |
|         | <i>Prevotella</i>                    | feces                 | Enriched              |
|         | <i>Staphylococcus</i>                | feces                 | Depleted              |
|         | <i>Bacteroides fragilis</i>          | feces, tissue         | Enriched              |
|         | <i>Blautia coccooides</i>            | feces                 | Enriched              |
|         | <i>Escherichia coli</i>              | feces, tissue         | Enriched              |
|         | <i>Fusobacterium nucleatum</i>       | feces, tissue         | Enriched              |
|         | <i>Parvimonas micra</i>              | feces                 | Enriched              |
|         | <i>Peptostreptococcus stomatis</i>   | feces                 | Enriched              |
|         | <i>Porphyromonas asaccharolytica</i> | feces                 | Enriched              |
|         | <i>Prevotella intermedia</i>         | feces, saliva         | Enriched              |

**Amitay et al. 2018** CRC or adenomas vs healthy controls

| Taxa    | Name                               | Biosample | CRC enriched/depleted            |
|---------|------------------------------------|-----------|----------------------------------|
| Phylum  |                                    |           |                                  |
|         | Fusobacteriota                     | feces     | Enriched                         |
|         | Bacillota (Firmicutes)             | feces     | Depleted                         |
| Family  |                                    |           |                                  |
|         | <i>Clostridiales</i>               | feces     | Depleted                         |
|         | <i>Lachnospiraceae</i>             | feces     | Mixed                            |
|         | <i>Porphyromonadaceae</i>          | feces     | Enriched (+ enriched in adenoma) |
| Genus   |                                    |           |                                  |
|         | <i>Roseburia</i>                   | feces     | Depleted                         |
|         | <i>Eubacterium</i>                 | feces     | Depleted                         |
|         | <i>Parvimonas</i>                  | feces     | Enriched                         |
|         | <i>Peptostreptococcus</i>          | feces     | Enriched                         |
|         | <i>Ruminococcus</i>                | feces     | Depleted                         |
|         | <i>Selenomonas</i>                 | feces     | Enriched                         |
|         | <i>Streptococcus</i>               | feces     | Mixed in adenoma only            |
|         | <i>Fusobacterium</i>               | feces     | Enriched (+ enriched in adenoma) |
|         | <i>Leptotrichia</i>                | feces     | Enriched                         |
|         | <i>Porphyromonas</i>               | feces     | Enriched                         |
|         | <i>Bacteroides</i>                 | feces     | Mixed                            |
|         | <i>Atopobium</i>                   | feces     | Enriched                         |
|         | <i>Bifidobacterium</i>             | feces     | Depleted                         |
|         | <i>Bilophila</i>                   | feces     | Enriched                         |
|         |                                    |           |                                  |
| Species | <i>Roseburia intestinalis</i>      | feces     | Depleted                         |
|         | <i>Eubacterium ventriosum</i>      | feces     | Depleted                         |
|         | <i>Parvimonas micra</i>            | feces     | Enriched                         |
|         | <i>Peptostreptococcus stomatis</i> | feces     | Mixed                            |
|         | <i>Fusobacterium nucleatum</i>     | feces     | Enriched (+ enriched in adenoma) |

**Borges-Canha et al. 2015** CRC or adenomas vs controls. Animal studies excluded.

| Taxa    | Name                                      | Biosample     | CRC enriched/depleted            |
|---------|-------------------------------------------|---------------|----------------------------------|
| Phylum  |                                           |               |                                  |
|         | Actinomycetota (subclass Coriobacteridae) | tissue        | Enriched                         |
|         | Pseudomonadota (Proteobacteria)           | tissue        | Enriched (+ enriched in adenoma) |
| Family  |                                           |               |                                  |
|         | <i>Eubacteriaceae</i>                     | feces         | Depleted                         |
|         | <i>Staphylococcaceae</i>                  | feces         | Enriched                         |
|         | <i>Enterobacteriaceae</i>                 | feces, tissue | Mixed (+ enriched in adenoma)    |
|         | <i>Campylobacteraceae</i>                 | feces         | Enriched                         |
| Genus   |                                           |               |                                  |
|         | <i>Fusobacterium</i>                      | feces, tissue | Enriched (+ enriched in adenoma) |
|         | <i>Bacteroides</i>                        | feces, tissue | Enriched (+ mixed in adenoma)    |
|         | <i>Prevotella</i>                         | feces, tissue | Enriched                         |
|         | <i>Porphyromonas</i>                      | feces         | Enriched                         |
|         | <i>Dysgonomonas</i>                       | feces         | Enriched                         |
|         | <i>Bifidobacterium</i>                    | feces, tissue | Depleted                         |
|         | <i>Slackia</i>                            | tissue        | Enriched                         |
|         | <i>Collinsella</i>                        | tissue        | Enriched                         |
|         | <i>Lactobacillus</i>                      | feces         | Depleted                         |
|         | <i>Roseburia</i>                          | feces         | Depleted                         |
|         |                                           |               |                                  |
| Species | <i>Fusobacterium nucleatum</i>            | tissue        | Enriched                         |
|         | <i>Faecalibacterium prausnitzii</i>       | feces, tissue | Depleted                         |
|         | <i>Akkermansia muciniphila</i>            | feces         | Enriched                         |
|         | <i>Faecalibacterium</i> spp               | feces         | Enriched in adenoma only         |

**Liu et al. 2016** CRC vs healthy controls

| Taxa    | Name                                | Biosample | CRC enriched/depleted |
|---------|-------------------------------------|-----------|-----------------------|
| Family  |                                     |           |                       |
|         | <i>Enterobacteriaceae</i>           | feces     | Enriched              |
| Genus   |                                     |           |                       |
|         | <i>Bifidobacterium</i>              | feces     | Depleted              |
|         | <i>Fusobacterium</i>                | feces     | Enriched              |
| Species |                                     |           |                       |
|         | <i>Faecalibacterium prausnitzii</i> | feces     | Depleted              |
|         | <i>Enterococcus faecalis</i>        | feces     | Enriched              |
|         | <i>Enterococcus faecium</i>         | feces     | Enriched              |

**Aprile et al. 2021** Adenomas vs controls.

| Taxa    | Name                                     | Biosample        | Adenoma enriched/depleted |
|---------|------------------------------------------|------------------|---------------------------|
| Phylum  |                                          |                  |                           |
|         | Pseudomonadota (Proteobacteria)          | tissue           | Enriched                  |
|         | Bacillota (Firmicutes)                   | tissue           | Depleted                  |
| Genus   | <i>Pseudomonas</i>                       | tissue           | Enriched                  |
|         | <i>Helicobacter</i>                      | tissue           | Enriched                  |
|         | <i>Acinetobacter</i>                     | tissue           | Enriched                  |
|         | <i>Fusobacteria</i>                      | feces            | Enriched                  |
|         | <i>Porphyromonas</i>                     | feces            | Enriched                  |
|         | <i>Lactobacillus</i>                     | feces            | Depleted                  |
|         | <i>Roseburia</i>                         | feces            | Depleted                  |
|         | <i>Clostridium</i>                       | feces            | Depleted                  |
|         | <i>Bifidobacterium</i>                   | feces,<br>tissue | Depleted                  |
|         | <i>Enterococcus</i>                      | feces            | Enriched                  |
|         | <i>Streptococcus</i>                     | feces            | Enriched                  |
|         | <i>Faecalibacterium</i>                  | tissue           | Depleted                  |
|         | <i>Romboutsia</i>                        | tissue           | Depleted                  |
| Species |                                          |                  |                           |
|         | <i>Fusobacterium nucleatum</i>           | feces            | Enriched                  |
|         | <i>Fusobacterium varium</i>              | feces            | Enriched                  |
|         | <i>Fusobacterium mortiferum</i>          | tissue           | Enriched                  |
|         | <i>Enterococcus faecalis</i>             | feces            | Enriched                  |
|         | <i>Streptococcus bovis</i>               | feces            | Enriched                  |
|         | <i>Bacteroides fragilis</i>              | feces            | Enriched                  |
|         | <i>Faecalibacterium prausnitzii</i>      | tissue           | Depleted                  |
|         | <i>Bifidobacterium pseudocatenulatum</i> | tissue           | Depleted                  |
|         | <i>Bacteroides massiliensis</i>          | feces            | Enriched                  |
|         | <i>Bacteroides dorei</i>                 | feces            | Enriched                  |
|         | <i>Escherichia coli</i>                  | tissue           | Enriched                  |
